# Supplementary material
Source: PubMed Central journal article supplement (PMC5443996)
Supplement: mmc1.pdf [file mmc1.pdf]

**Biophysical Journal, Volume 112**

**Supplemental Information**

**Optimal Affinity Enhancement by a Conserved Flexible Linker Controls  
p53 Mimicry in MdmX**

**Wade Borchers, Andreas Becker, Lihong Chen, Jiandong Chen, Lucía B. Chemes, and Gary W. Daughdrill**



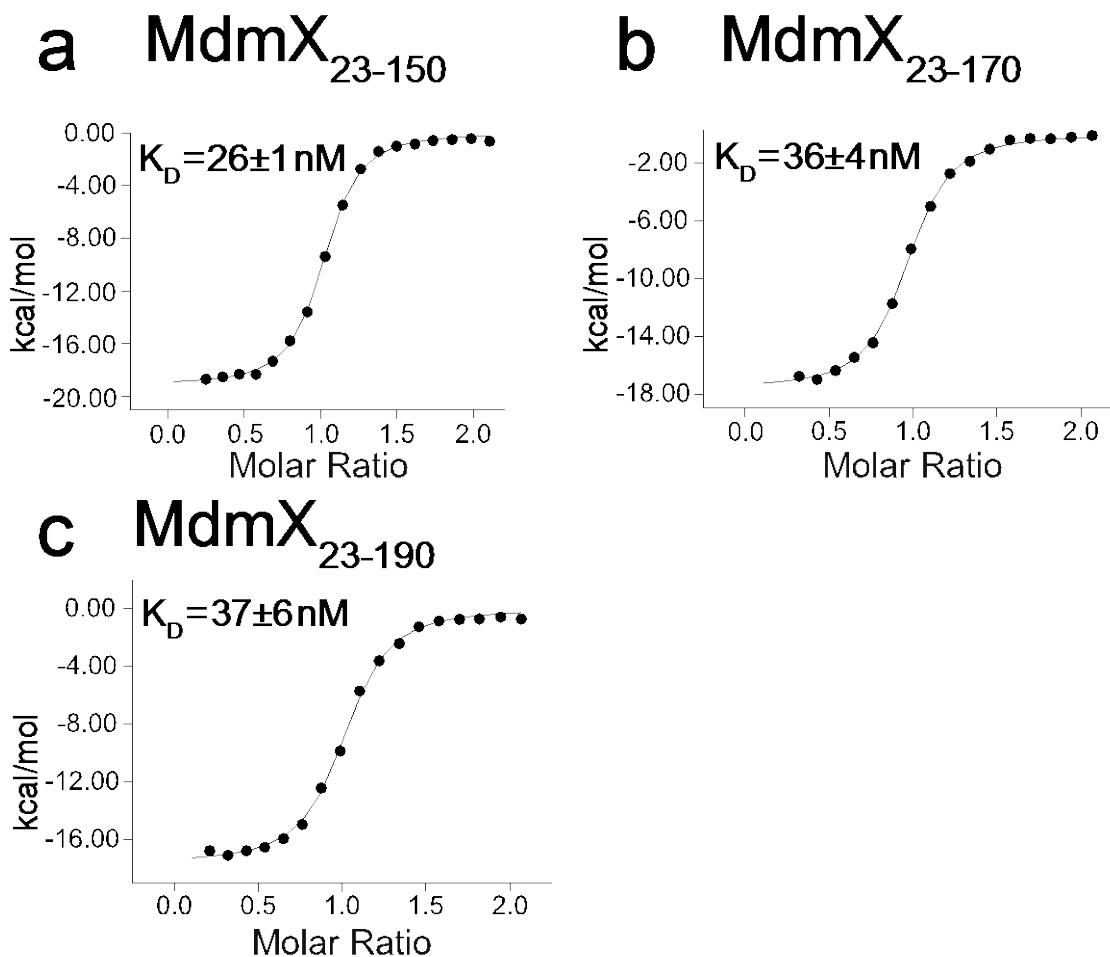

Figure S2: **p53TAD binding to fragments of MdmX with different lengths of the flexible linker.** Black circles show enthalpy per mole of injectant, measured using isothermal titration calorimetry, plotted as a function  $[p53TAD]/[MdmX]$ . Black lines show the fit to the data using a single site binding model. a. p53TAD binding to MdmX<sub>23-150</sub>. b. p53TAD binding to MdmX<sub>23-170</sub>. c. p53TAD binding to MdmX<sub>23-190</sub>.

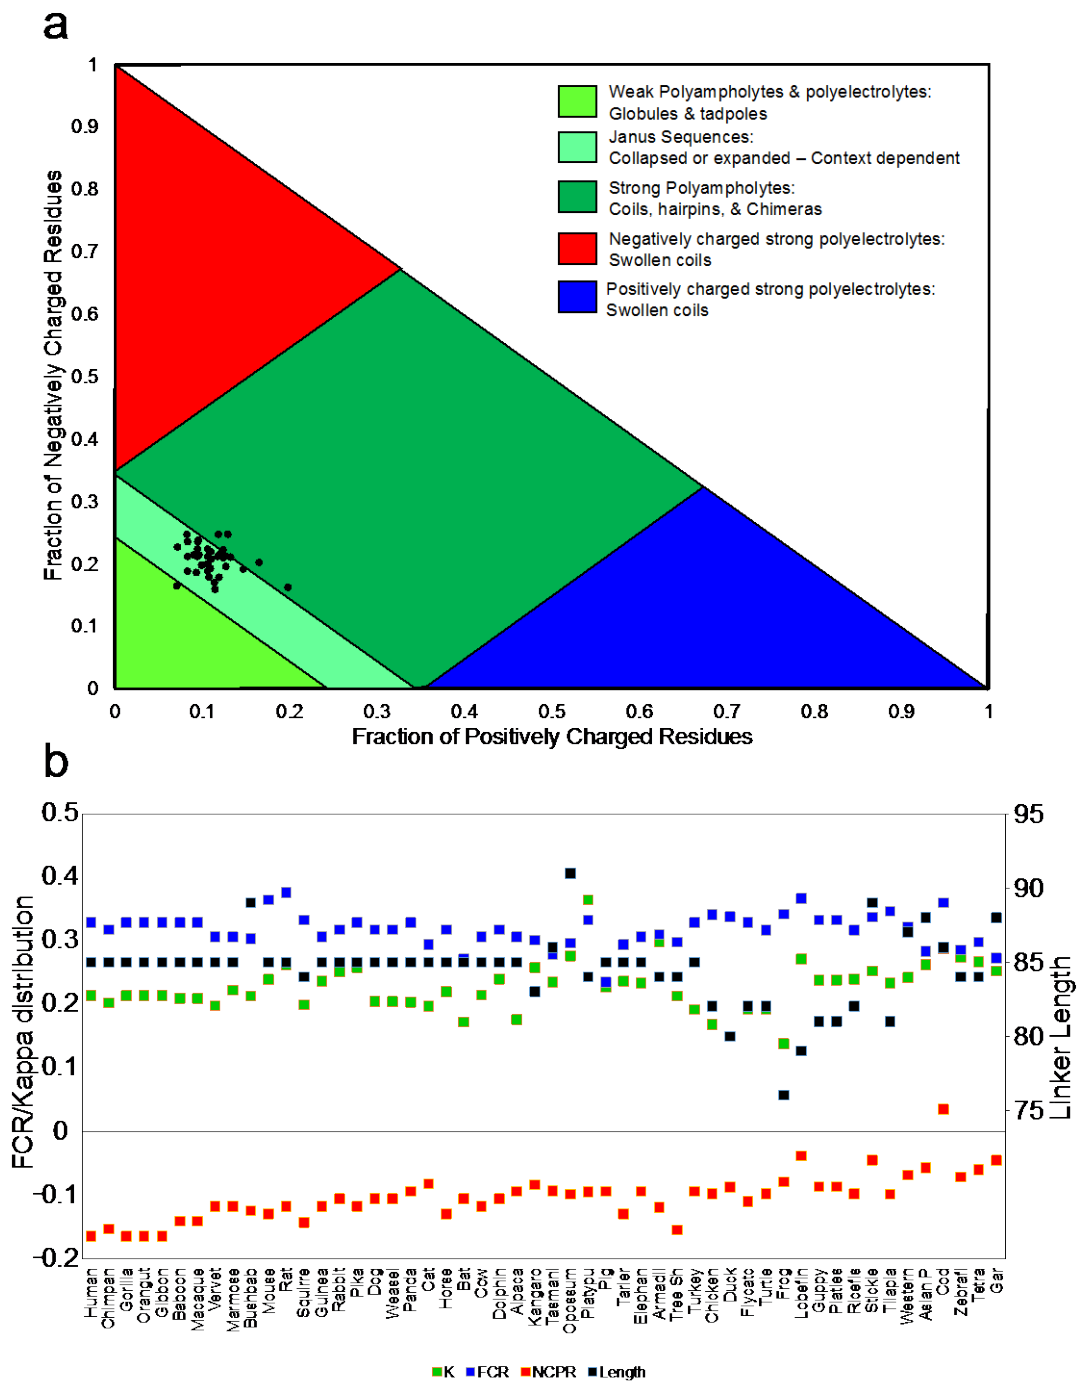

**Wormlike chain (WLC) modeling of the MdmX linker region**

To model the behavior of the MdmX linker we used a previously described wormlike chain model that considers a polypeptide chain to behave as a continuous cylinder with a fixed but randomly directed radius of curvature (2,3). In this model, the end-to-end distribution depends only on two parameters, the persistence length  $L_p$  (length it takes for the motions to become uncorrelated) and the contour length  $L_c$  (total length of the chain). For our calculations, we used a persistence length  $L_p = 3\text{Å}$  which has been used previously for amino acid chains [Zhou, 2004] and  $L_c = N_{\text{res}} * 3.8\text{Å}$ , where  $N_{\text{res}}$  is the number of residues in the linker (in this case 85), and  $3.8\text{Å}$  is the distance per chain element, in this case one amino acid.

$P(r)$  calculations: The distribution function for the end-to-end distances can be written as

$$p(r) = 4\pi r^2 \left( \frac{3}{4\pi L_p L_c} \right)^{\frac{3}{2}} \exp\left( \frac{-3r^2}{4L_p L_c} \right) \zeta(r, L_p, L_c) \quad [1]$$

Where the last term is defined as:

$$\zeta(r, L_p, L_c) = 1 - \left\{ \frac{5L_p}{4L_c} - \frac{2r^2}{L_c} + \frac{33r^4}{80L_p L_c^3} + \frac{79L_p^2}{160L_c^2} + \frac{329L_p r^2}{120L_c^3} - \frac{6799r^4}{1600L_c^4} + \frac{3441r^6}{2800L_p L_c^5} - \frac{1089r^8}{12800L_p^2 L_c^6} \right\} \quad [2]$$

$C_{\text{eff}}$  calculations: The effective concentration in the bound state when the linker is restrained to a distance between binding sites  $r_o$  can be expressed as:

$$C_{\text{eff}} = \frac{p(r_o)}{4\pi r^2} \frac{10^{27} \text{Å}^3 l^{-1}}{L_o} \quad [3]$$

Where  $L_o$  is Avogadro's number, and  $C_{\text{eff}}$  is expressed in molar units. Multiplying Eq. [3] by  $10^3$  gives  $C_{\text{eff}}$  in millimolar units.

**Equilibrium scheme used for WLC modeling of binding affinity enhancement for the MdmX linker.**

We used the following equilibria to model the MdmX intramolecular interaction, and the MdmX-p53 interactions

**I- Model for bimolecular interaction of WW with MdmX**

We define the first equilibrium as:

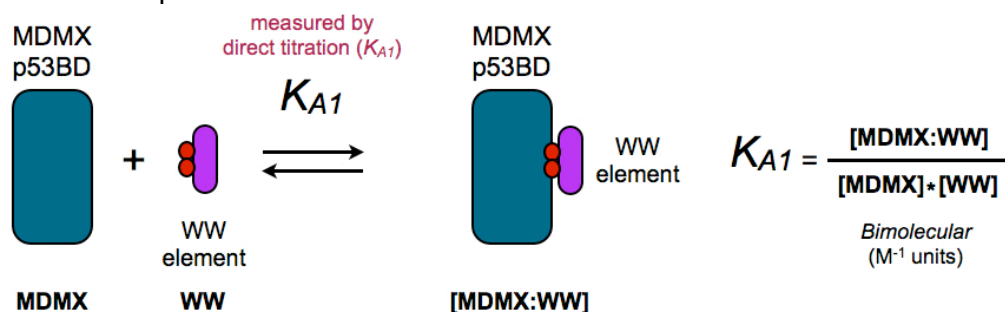

Where  $K_{A1}$  is the measured bimolecular association constant of the MdmX WW element to the MdmX p53 binding domain, in units of  $M^{-1}$ .

**II- Model for intramolecular binding of WW to MdmX**

We define the intramolecular MdmX equilibrium as:

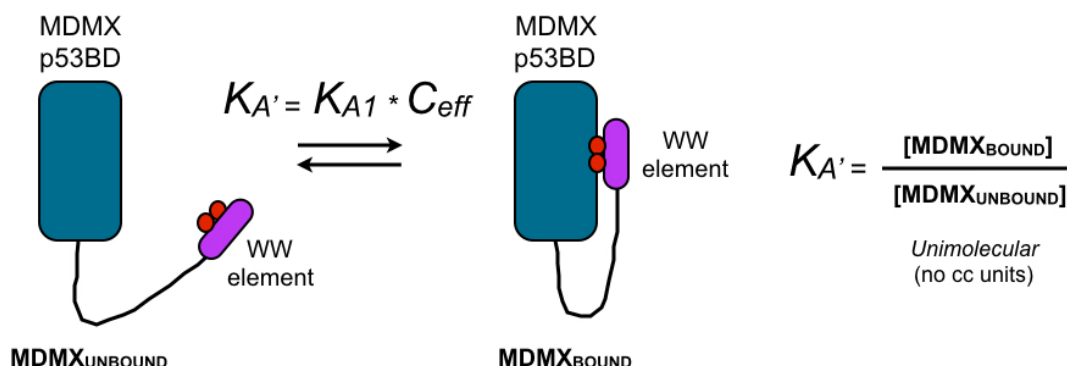

And

$$K_{A'} = K_{A1} * C_{eff} \quad [4]$$

Where  $K_{A'}$  is the intra-molecular binding constant, and  $C_{eff}$  is the effective concentration, which was estimated from the WLC model (Eqn. [1]-[3]).  $K_{A'}$  is unimolecular and therefore has no concentration units.

**III- Calculating populations of MdmX<sub>UNBOUND</sub> and MdmX<sub>BOUND</sub> from  $K_{A'}$**

From the definition of  $K_{A'} = [\text{MdmX}_{\text{BOUND}}]/[\text{MdmX}_{\text{UNBOUND}}]$  we can calculate the fractional population of the MdmX<sub>BOUND</sub> and MdmX<sub>UNBOUND</sub> conformers as:

$$f_{\text{MdmX}_{\text{BOUND}}} = \frac{K_{A'}}{1+K_{A'}}; f_{\text{MdmX}_{\text{UNBOUND}}} = \frac{1}{1+K_{A'}} \quad [5]$$

## Supporting Material

Which does not depend on the concentration of MdmX.

### IV- Modeling the competition between P53TAD and WW for binding to MdmX

Taking into account the previous equilibria, the binding of p53TAD to the MdmX variant containing the intramolecular motif can be modeled as follows:

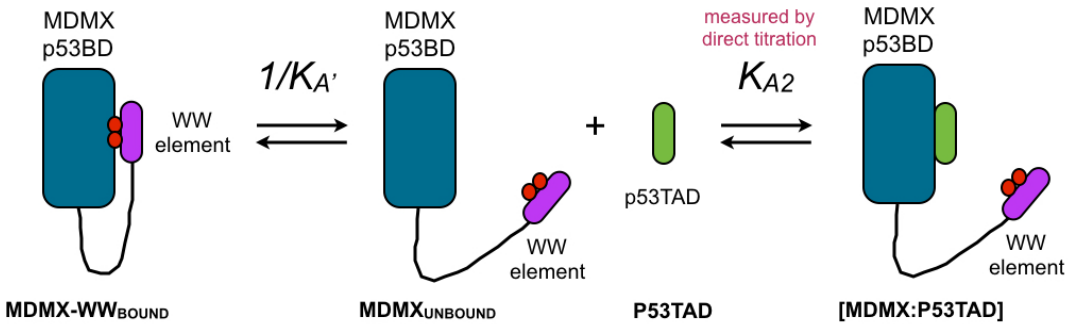

Where, based on measurements of the bimolecular association constant for binding of P53TAD to the MdmX domain without the intramolecular motif ( $K_{A2}$ ), we can calculate the global equilibrium association constant for binding of p53TAD to the motif-containing MdmX construct as:

$$K_{A \text{ global}} = \frac{1}{K_{A'}} * K_{A2} \quad [6]$$

$$K_{D \text{ global}} = K_{A'} * K_{D2} \quad [7]$$

Note that  $K_{D \text{ global}} = K_{A'} * K_{D2}$  and  $K_{A'} = K_A * C_{\text{eff}}$ . This implies that higher values of  $C_{\text{eff}}$  lead to an increase in the global  $K_D$  value. This is equivalent to a decrease in the global binding affinity of p53TAD to MdmX. Therefore, higher values for  $C_{\text{eff}}$  lead to stronger MdmX intramolecular interactions and weakened P53TAD association to MdmX.

### Methods

#### Sequence Alignments

Mdmx alignments were carried out with the Geneious software suite version 10.0.7(4) using the ClustalW alignment algorithm (5) set to use the Blosum62 matrix with a gap open penalty of 12, extension penalty of 3, and 2 refinement iterations. The indicated residue numbers align with human mdmx.

#### Protein Expression and Purification

Mdmx cDNA constructs encoding residues 23-111, 23-150, 23-170, 23-190, and 23-210 were expressed using the pGEX-6p-2 vector transformed into BL21(DE3) cells and grown in minimal media. Overnight cultures were used to start cultures at OD<sub>600</sub>=0.04 and were grown to an OD<sub>600</sub> of 0.6 and then induced with 1mM IPTG at 15 degrees Celsius for 16 hours. Pellets were re-suspended and lysed via French press in 50mM Tris, 300mM NaCl, 2.5mM EDTA, 1mM DTT, and 0.02% sodium azide pH 7.4 in the presence of ThermoScientific Pierce protease inhibitors (88665). GST tagged protein was then purified by passing the soluble fraction of lysate through a glutathione sepharose column (GE 17513201) and eluting with 10mM reduced glutathione. The GST tag was cleaved by incubation with the GST tagged HRV3C protease overnight at 4 Celsius, the glutathione was dialyzed away, and the cleaved tag was removed via a second glutathione sepharose column. The flowthrough is further purified via a superdex 75 SEC column (GE 28989333). The p53TAD construct encoding residues 1-73 in pET28A was prepared and purified as previously described (6).

#### Isothermal Titration Calorimetry

Mdmx and p53 polypeptides were co-dialyzed into 50mM NaPO<sub>4</sub>, 150mM NaCl, 1mM EDTA, 0.02% Sodium Azide, 8mM BME at pH 6.8. For mdmx constructs shorter than 23-210 3 replicate titrations were conducted with 2uM Mdmx in the cell and 20uM of p53 1-73 in the syringe using 15uL injections using a MicroCal-VP-ITC system at 25 celsius. For the 23-210 Mdmx construct 2 titrations were conducted using a MicroCal-ITC 200 system with 80uM Mdmx in the cell and 975uM of p53TAD 1-73 in the syringe using 2.05uL injections at 25 celsius. The corrected heat values were fit using Microcal origin software's (7.0) built in non-linear least square curve-fitting algorithm yielding the stoichiometry, enthalpy, and affinity constants reported.

1. Holehouse, A.S., Das, R.K., Ahad, J.N., Richardson, M.O.G., and Pappu, R.V. 2017. CIDER: Resources to Analyze Sequence-Ensemble Relationships of Intrinsically Disordered Proteins. *Biophys. J.* 112, 16-21.
2. Zhou, H. X. 2004. Polymer models of protein stability, folding, and interactions. *Biochemistry* 43:2141-2154.
3. Bertagna, A., D. Topygin, L. Brand, and D. Barrick. 2008. The effects of conformational heterogeneity on the binding of the Notch intracellular domain to effector proteins: a case of biologically tuned disorder. *Biochem. Soc. Trans.* 36:157-166.
4. Kearse, M., Moir, R., Wilson, A., Stones-Havas, S., Cheung, M., Sturrock, S., Buxton, S., Cooper, A., Markowitz, S., Duran, C., Thierer, T., Ashton, B., Mentjies, P., & Drummond, A. 2012. Geneious Basic: an integrated and extendable desktop software platform for the organization and analysis of sequence data. *Bioinformatics*, 28(12), 1647-1649.
5. Thompson, J. D., Higgins, D. G., & Gibson, T. J. 1994. CLUSTAL W: improving the sensitivity of progressive multiple sequence alignment through sequence weighting, position-specific gap penalties and weight matrix choice. *Nucleic Acids Research*, 22(22), 4673-4680.
6. Vise, Pamela D. et al. "NMR Chemical Shift and Relaxation Measurements Provide Evidence for the Coupled Folding and Binding of the p53 Transactivation Domain." *Nucleic Acids Research* 33.7 (2005): 2061-2077. *PMC*. Web. 17 Oct. 2016.
